# Supplementary material
Source: MDPI journal article supplement (https://www.mdpi.com/2076-3417/12/7/3368)
Supplement: s1 [file s1]

# Mn(II) Sorption on Stream Sediments Sampled in Manganese Mining Area: Dynamics and Mechanisms

Fan Yang, Yankui Tang \*, Yuwei Mi, Lu Jiang, Penghong Luo and Yang Yang

School of Resources, Environment and Materials, Guangxi University, Nanning 53004, China; 18776902722@163.com (F.Y.); 18629670151@163.com (Y.M.); kingdomssdabu@163.com (L.J.); penghongLuo@outlook.com (P.L.); Yy123756868505@163.com (Y.Y.)

\* Correspondence: cindykyktang@gxu.edu.cn; Fax: +86-0771-3273440

**Table S1.** Relative abundance of 16S rRNA gene sequences classified to genus levels.

| Genus                              | Relative Abundance (%) | Genus             | Relative Abundance (%) |
|------------------------------------|------------------------|-------------------|------------------------|
| Acinetobacter                      | 0.297                  | Streptophyta      | 0.011                  |
| Nitrospira                         | 0.750                  | Bradyrhizobium    | 0.232                  |
| Nitrosomonas                       | 0.117                  | Gp17              | 1.157                  |
| Bacillariophyta                    | 0.024                  | Rhizobium         | 0.095                  |
| Sphingomonas                       | 0.684                  | Gp4               | 2.133                  |
| Gp6                                | 8.065                  | Aridibacter       | 1.010                  |
| Pseudomonas                        | 4.671                  | Microvirgula      | 0.017                  |
| Azospira                           | 0.085                  | Gaiella           | 1.083                  |
| Dickeya                            | 0.011                  | Pseudoxanthomonas | 0.028                  |
| Gp10                               | 0.739                  | Gp7               | 1.022                  |
| Meiothermus                        | 0.159                  | Prevotella        | 0.067                  |
| Vogesella                          | 0.069                  | Fictibacillus     | 0.046                  |
| Exiguobacterium                    | 0.045                  | Unclassified      | 52.617                 |
| Subdivision3_Genera_Incertae_Sedis | 0.561                  | Other             | 24.199                 |

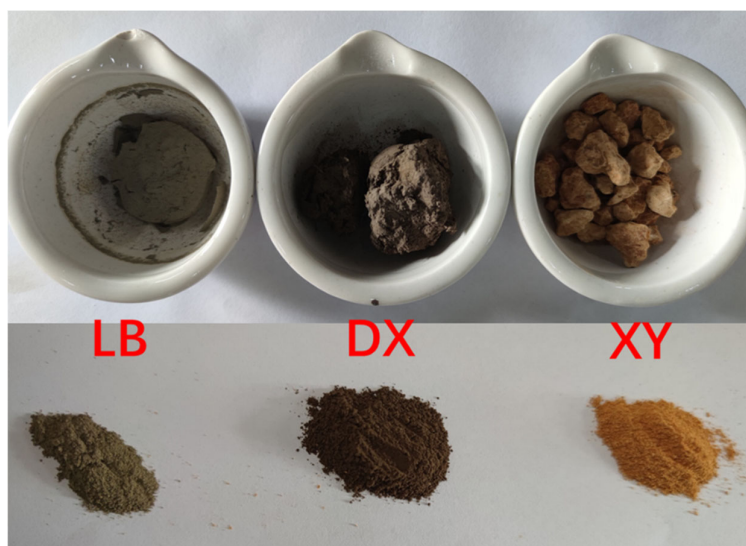

**Figure S1.** Air-dried sediment and sieved sediment.
